# Supplementary material
Source: MDPI journal article supplement (https://www.mdpi.com/2038-8330/15/2/26)
Supplement: s1 [file s1]

**Table S1.** Comprehensive index of genetic variants identified with liquid tumor genetic profiling, including those of significance, of targetable significance, and of unknown significance. \*Patients (ALL, AML, Lymphoma)

| <b>Alterations</b>     | <b>Total<br/>(N=12)</b> | <b>Acute<br/>Lymphoblastic<br/>Leukemia<br/>(N=5)</b> | <b>Acute Myeloid<br/>Leukemia (N=6)</b> | <b>Anaplastic Large<br/>Cell Lymphoma<br/>(N=1)</b> |
|------------------------|-------------------------|-------------------------------------------------------|-----------------------------------------|-----------------------------------------------------|
| 220+1G>T               | 1 (0, 0, 1)             |                                                       | 1 (0, 0, 1)                             |                                                     |
| ABL1                   | 2 (0, 2, 0)             | 1 (0, 1, 0)                                           | 1 (0, 1, 0)                             |                                                     |
| ATM                    | 1 (0, 1, 0)             |                                                       | 1 (0, 1, 0)                             |                                                     |
| ATR                    | 1 (0, 0, 1)             | 1 (0, 0, 1)                                           |                                         |                                                     |
| ATRX                   | 1 (0, 0, 1)             |                                                       | 1 (0, 0, 1)                             |                                                     |
| AURKB                  | 1 (0, 0, 1)             | 1 (0, 0, 1)                                           |                                         |                                                     |
| AXIN1                  | 1 (0, 0, 1)             | 1 (0, 0, 1)                                           |                                         |                                                     |
| B2M                    | 1 (0, 0, 1)             | 1 (0, 0, 1)                                           |                                         |                                                     |
| BCL11B                 | 1 (0, 0, 1)             | 1 (0, 0, 1)                                           |                                         |                                                     |
| BLM                    | 3 (1, 0, 2)             | 1 (0, 0, 1)                                           | 2 (1, 0, 1)                             |                                                     |
| BLM C11ORF30<br>(EMSY) | 1 (1, 0, 0)             |                                                       | 1 (1, 0, 0)                             |                                                     |
| BRCA2                  | 2 (0, 0, 2)             | 1 (0, 0, 1)                                           | 1 (0, 0, 1)                             |                                                     |
| BTG1                   | 1 (0, 0, 1)             | 1 (0, 0, 1)                                           |                                         |                                                     |
| CD22                   | 1 (1, 0, 0)             |                                                       | 1 (1, 0, 0)                             |                                                     |

| <b>Alterations</b> | <b>Total<br/>(N=12)</b> | <b>Acute<br/>Lymphoblastic<br/>Leukemia<br/>(N=5)</b> | <b>Acute Myeloid<br/>Leukemia (N=6)</b> | <b>Anaplastic Large<br/>Cell Lymphoma<br/>(N=1)</b> |
|--------------------|-------------------------|-------------------------------------------------------|-----------------------------------------|-----------------------------------------------------|
| CDKN2A             | 4 (0, 0, 4)             | 3 (0, 0, 3)                                           | 1 (0, 0, 1)                             |                                                     |
| CIITA              | 1 (0, 0, 1)             | 1 (0, 0, 1)                                           |                                         |                                                     |
| CSF3R              | 1 (0, 1, 0)             |                                                       | 1 (0, 1, 0)                             |                                                     |
| CTCF               | 1 (0, 0, 1)             | 1 (0, 0, 1)                                           |                                         |                                                     |
| CTNNA1             | 1 (0, 0, 1)             | 1 (0, 0, 1)                                           |                                         |                                                     |
| CUX1               | 1 (0, 0, 1)             | 1 (0, 0, 1)                                           |                                         |                                                     |
| DOT1               | 1 (0, 0, 1)             | 1 (0, 0, 1)                                           |                                         |                                                     |
| ERBB4              | 1 (1, 0, 0)             |                                                       | 1 (1, 0, 0)                             |                                                     |
| ETV6               | 1 (0, 0, 1)             | 1 (0, 0, 1)                                           |                                         |                                                     |
| FANCD2             | 1 (0, 0, 1)             | 1 (0, 0, 1)                                           |                                         |                                                     |
| FGF14              | 1 (1, 0, 0)             |                                                       | 1 (1, 0, 0)                             |                                                     |
| FGFR1              | 1 (0, 0, 1)             | 1 (0, 0, 1)                                           |                                         |                                                     |
| FGFR3              | 1 (0, 0, 1)             | 1 (0, 0, 1)                                           |                                         |                                                     |
| FHIT               | 1 (1, 0, 0)             |                                                       | 1 (1, 0, 0)                             |                                                     |
| FLYWCH1            | 1 (1, 0, 0)             |                                                       | 1 (1, 0, 0)                             |                                                     |
| FOXO3              | 1 (1, 0, 0)             |                                                       | 1 (1, 0, 0)                             |                                                     |
| G12S               | 1 (0, 0, 1)             |                                                       | 1 (0, 0, 1)                             |                                                     |
| GATA1 splice site  | 1 (0, 0, 1)             |                                                       | 1 (0, 0, 1)                             |                                                     |
| HIST1H1E           | 1 (0, 0, 1)             | 1 (0, 0, 1)                                           |                                         |                                                     |

| <b>Alterations</b> | <b>Total<br/>(N=12)</b> | <b>Acute<br/>Lymphoblastic<br/>Leukemia<br/>(N=5)</b> | <b>Acute Myeloid<br/>Leukemia (N=6)</b> | <b>Anaplastic Large<br/>Cell Lymphoma<br/>(N=1)</b> |
|--------------------|-------------------------|-------------------------------------------------------|-----------------------------------------|-----------------------------------------------------|
| HSP90AA1           | 1 (0, 0, 1)             | 1 (0, 0, 1)                                           |                                         |                                                     |
| I49T               | 1 (0, 0, 1)             |                                                       | 1 (0, 0, 1)                             |                                                     |
| IGF1R              | 1 (0, 0, 1)             | 1 (0, 0, 1)                                           |                                         |                                                     |
| IKBKE              | 1 (1, 0, 0)             |                                                       | 1 (1, 0, 0)                             |                                                     |
| JARID2             | 1 (0, 0, 1)             | 1 (0, 0, 1)                                           |                                         |                                                     |
| KDM5A              | 1 (0, 0, 1)             | 1 (0, 0, 1)                                           |                                         |                                                     |
| KDM6A              | 1 (0, 0, 1)             |                                                       | 1 (0, 0, 1)                             |                                                     |
| KEAP1              | 1 (0, 0, 1)             | 1 (0, 0, 1)                                           |                                         |                                                     |
| KMT2A (MLL)        | 1 (0, 0, 1)             | 1 (0, 0, 1)                                           |                                         |                                                     |
| KMT2A-CHEK2        | 1 (1, 0, 0)             |                                                       | 1 (1, 0, 0)                             |                                                     |
| KMT2A-MLLT6        | 2 (0,0,2)               | 1 (0, 0, 1)                                           | 1 (0, 0, 1)                             |                                                     |
| KMT2C (MLL3)       | 1 (0, 0, 1)             |                                                       | 1 (0, 0, 1)                             |                                                     |
| KRAS               | 2 (2, 0, 0)             | 1 (1, 0, 0)                                           | 1 (0, 0, 1)                             |                                                     |
| MAP3K1             | 1 (0, 0, 1)             | 1 (0, 0, 1)                                           |                                         |                                                     |
| MED12              | 2 (2, 0, 0)             |                                                       | 2 (2, 0, 0)                             |                                                     |
| MET                | 1 (0, 0, 1)             | 1 (0, 0, 1)                                           |                                         |                                                     |
| MLH1               | 1 (0, 0, 1)             | 1 (0, 0, 1)                                           |                                         |                                                     |
| MLL2               | 1 (0, 0, 1)             | 1 (0, 0, 1)                                           |                                         |                                                     |
| MSH3               | 1 (0, 0, 1)             | 1 (0, 0, 1)                                           |                                         |                                                     |

| <b>Alterations</b> | <b>Total<br/>(N=12)</b> | <b>Acute<br/>Lymphoblastic<br/>Leukemia<br/>(N=5)</b> | <b>Acute Myeloid<br/>Leukemia (N=6)</b> | <b>Anaplastic Large<br/>Cell Lymphoma<br/>(N=1)</b> |
|--------------------|-------------------------|-------------------------------------------------------|-----------------------------------------|-----------------------------------------------------|
| MTOR               | 1 (0, 0, 1)             | 1 (0, 0, 1)                                           |                                         |                                                     |
| MYO18A             | 2 (0, 0, 2)             | 2 (0, 0, 2)                                           |                                         |                                                     |
| MYD88              | 1 (1, 0, 0)             |                                                       | 1 (1, 0, 0)                             |                                                     |
| MYST3              | 1 (1, 0, 0)             |                                                       | 1 (1, 0, 0)                             |                                                     |
| NCOR2              | 1 (1, 0, 0)             |                                                       | 1 (1, 0, 0)                             |                                                     |
| NKX2-1             | 1 (0, 0, 1)             | 1 (0, 0, 1)                                           |                                         |                                                     |
| NOTCH1             | 1 (0, 0, 1)             | 1 (0, 0, 1)                                           |                                         |                                                     |
| NOTCH2             | 1 (0, 0, 1)             | 1 (0, 0, 1)                                           |                                         |                                                     |
| NPM1-ALK Fusion    | 2 (0, 2, 0)             |                                                       | 1 (0, 1, 0)                             | 1 (0, 1, 0)                                         |
| NRAS               | 1 (0, 0, 1)             |                                                       | 1 (0, 0, 1)                             |                                                     |
| NT5C2              | 1 (0, 0, 1)             | 1 (0, 0, 1)                                           |                                         |                                                     |
| NTRK2              | 1 (0, 0, 1)             | 1 (0, 0, 1)                                           |                                         |                                                     |
| NTRK3              | 1 (1, 0, 0)             |                                                       | 1 (1, 0, 0)                             |                                                     |
| NTSC2              | 1 (0, 0, 1)             | 1 (0, 0, 1)                                           |                                         |                                                     |
| NUP214-ABL1 fusion | 1 (0, 0, 1)             |                                                       | 1 (0, 0, 1)                             |                                                     |
| NUP98              | 1 (0, 0, 1)             | 1 (0, 0, 1)                                           |                                         |                                                     |
| p16INK4a           | 1 (0, 0, 1)             |                                                       | 1 (0, 0, 1)                             |                                                     |
| PASK               | 1 (0, 0, 1)             | 1 (0, 0, 1)                                           |                                         |                                                     |

| <b>Alterations</b>       | <b>Total<br/>(N=12)</b> | <b>Acute<br/>Lymphoblastic<br/>Leukemia<br/>(N=5)</b> | <b>Acute Myeloid<br/>Leukemia (N=6)</b> | <b>Anaplastic Large<br/>Cell Lymphoma<br/>(N=1)</b> |
|--------------------------|-------------------------|-------------------------------------------------------|-----------------------------------------|-----------------------------------------------------|
| PAX5-PTPLAD2<br>fusion   | 1 (0, 0, 1)             | 1 (0, 0, 1)                                           |                                         |                                                     |
| PCLO                     | 1 (0, 0, 1)             | 1 (0, 0, 1)                                           |                                         |                                                     |
| PDGFRB                   | 1 (0, 0, 1)             | 1 (0, 0, 1)                                           |                                         |                                                     |
| PIK3R2                   | 1 (0, 0, 1)             | 1 (0, 0, 1)                                           |                                         |                                                     |
| PIM1 Amplification       | 1 (0, 0, 1)             |                                                       |                                         | 1 (0, 0, 1)                                         |
| PLCG2                    | 1 (1, 0, 0)             |                                                       | 1 (1, 0, 0)                             |                                                     |
| PTCH1                    | 1 (1, 0, 0)             |                                                       | 1 (1, 0, 0)                             |                                                     |
| PTPN11                   | 2 (1, 0, 1)             |                                                       | 2 (1, 0, 1)                             |                                                     |
| PTPRO                    | 1 (0, 0, 1)             | 1 (0, 0, 1)                                           |                                         |                                                     |
| Q61R                     | 1 (0, 0, 1)             |                                                       | 1 (0, 0, 1)                             |                                                     |
| R2598Q                   | 1 (0, 0, 1)             |                                                       | 1 (0, 0, 1)                             |                                                     |
| R367Q                    | 1 (0, 0, 1)             | 1 (0, 0, 1)                                           |                                         |                                                     |
| RB1                      | 1 (0, 0, 1)             | 1 (0, 0, 1)                                           |                                         |                                                     |
| RELN                     | 1 (0, 0, 1)             | 1 (0, 0, 1)                                           |                                         |                                                     |
| RICTOR                   | 1 (1, 0, 0)             |                                                       | 1 (1, 0, 0)                             |                                                     |
| RUNX1 truncation<br>exon | 1 (0, 0, 1)             |                                                       | 1 (0, 0, 1)                             |                                                     |

| <b>Alterations</b>     | <b>Total<br/>(N=12)</b> | <b>Acute<br/>Lymphoblastic<br/>Leukemia<br/>(N=5)</b> | <b>Acute Myeloid<br/>Leukemia (N=6)</b> | <b>Anaplastic Large<br/>Cell Lymphoma<br/>(N=1)</b> |
|------------------------|-------------------------|-------------------------------------------------------|-----------------------------------------|-----------------------------------------------------|
| RUNX1- FPL22<br>fusion | 1 (0, 0, 1)             |                                                       | 1 (0, 0, 1)                             |                                                     |
| RUNX1-MECOM<br>Fusion  | 1 (0, 0, 1)             |                                                       | 1 (0, 0, 1)                             |                                                     |
| S1PR2                  | 1 (1, 0, 0)             |                                                       | 1 (1, 0, 0)                             |                                                     |
| S2215Y                 | 1 (0, 0, 1)             | 1 (0, 0, 1)                                           |                                         |                                                     |
| SETBP1                 | 1 (0, 0, 1)             | 1 (0, 0, 1)                                           |                                         |                                                     |
| SETD2                  | 1 (1, 0, 0)             |                                                       | 1 (1, 0, 0)                             |                                                     |
| SMARCA4                | 1 (0, 0, 1)             | 1 (0, 0, 1)                                           |                                         |                                                     |
| STAG2<br>Rearrangement | 1 (0, 0, 1)             |                                                       |                                         | 1 (0, 0, 1)                                         |
| T618I                  | 1 (0, 1, 0)             |                                                       | 1 (0, 1, 0)                             |                                                     |
| TET2                   | 1 (1, 0, 0)             |                                                       | 1 (1, 0, 0)                             |                                                     |
| TP53                   | 2 (1, 0, 1)             | 1 (0, 0, 1)                                           | 1 (1, 0, 0)                             |                                                     |
| TRAF3                  | 1 (0, 0, 1)             | 1 (0, 0, 1)                                           |                                         |                                                     |
| TSC1                   | 2 (1, 0, 1)             | 1 (0, 0, 1)                                           | 1 (1, 0, 0)                             |                                                     |
| TSC2                   | 2 (1, 0, 1)             | 1 (0, 0, 1)                                           | 1 (1, 0, 0)                             |                                                     |
| TYK2                   | 1 (0, 0, 1)             | 1 (0, 0, 1)                                           |                                         |                                                     |
| U2AF1                  | 1 (0, 0, 1)             | 1 (0, 0, 1)                                           |                                         |                                                     |

| <b>Alterations</b> | <b>Total<br/>(N=12)</b> | <b>Acute<br/>Lymphoblastic<br/>Leukemia<br/>(N=5)</b> | <b>Acute Myeloid<br/>Leukemia (N=6)</b> | <b>Anaplastic Large<br/>Cell Lymphoma<br/>(N=1)</b> |
|--------------------|-------------------------|-------------------------------------------------------|-----------------------------------------|-----------------------------------------------------|
| V272M              | 1 (0, 0, 1)             | 1 (0, 0, 1)                                           |                                         |                                                     |
| V379fs*71          | 1 (0, 0, 1)             |                                                       | 1 (0, 0, 1)                             |                                                     |
| W2139*             | 1 (0, 0, 1)             |                                                       | 1 (0, 0, 1)                             |                                                     |
| WDR90              | 2 (1, 0, 1)             | 1 (0, 0, 1)                                           | 1 (1, 0, 0)                             |                                                     |
| WT1                | 1 (0, 0, 1)             |                                                       | 1 (0, 0, 1)                             |                                                     |
| XBP1               | 1 (0, 0, 1)             | 1 (0, 0, 1)                                           |                                         |                                                     |
| Y736fs*5           | 1 (0, 0, 1)             |                                                       | 1 (0, 0, 1)                             |                                                     |
| ZND217             | 1 (1, 0, 0)             |                                                       | 1 (1, 0, 0)                             |                                                     |
| ZNF217             | 1 (0, 0, 1)             | 1 (0, 0, 1)                                           |                                         |                                                     |
| ZNF703             | 1 (0, 0, 1)             | 1 (0, 0, 1)                                           |                                         |                                                     |

**Table S2.** Comprehensive list of all potential targetable mutations identified.

| <b>Diagnosis</b>          | <b>Mutation(s)</b> | <b>Drug(s)</b>                        | <b>MOA</b>        | <b>Received Targeted<br/>Therapy based on<br/>Molecular Profiling</b> |
|---------------------------|--------------------|---------------------------------------|-------------------|-----------------------------------------------------------------------|
| Acute Myeloid<br>Leukemia | ABL1               | Bosutinib,<br>Dasatinib,<br>Imatinib, | BCR-ABL<br>kinase | No                                                                    |

| Diagnosis | Mutation(s)        | Drug(s)                                                           | MOA                                     | Received Targeted Therapy based on Molecular Profiling |
|-----------|--------------------|-------------------------------------------------------------------|-----------------------------------------|--------------------------------------------------------|
|           |                    | Nilotinib,<br><br>Ponatinib                                       |                                         |                                                        |
|           | ATM                | Olaparib,<br><br>Rucaparib,<br><br>Niraparib                      | PARP<br><br>inhibitor                   | No                                                     |
|           | CSF3R*             | Ruxolitinib                                                       | Jak-STAT<br><br>kinase<br><br>inhibitor | No                                                     |
|           | BRCA2              | Niraparib,<br><br>Olaparib,<br><br>Rucaparib,<br><br>Talazoparib  | PARP<br><br>inhibitor                   | No                                                     |
|           | NPM1-ALK<br>fusion | Alectinib,<br><br>Brigatinib,<br><br>Ceritinib,<br><br>Crizotinib | ALK inhibitor                           | No                                                     |
|           | KRAS               | Binimetinib,<br><br>Cobimetinib,<br><br>Trametinib                | MEK inhibitor                           | Yes                                                    |



| Diagnosis                    | Mutation(s) | Drug(s)                                                          | MOA                       | Received Targeted Therapy based on Molecular Profiling |
|------------------------------|-------------|------------------------------------------------------------------|---------------------------|--------------------------------------------------------|
| Acute Lymphoblastic Leukemia | ABL1        | Bosutinib,<br>Dasatinib,<br>Imatinib,<br>Nilotinib,<br>Ponatinib | Tyrosine kinase inhibitor | Yes                                                    |
|                              | KRAS        | Selumetinib,<br>Trametinib                                       | MEK inhibitor             | No                                                     |
| Large Cell Lymphoma          | ALK         | Alectinib,<br>Brigatinib,<br>Ceritinib,<br>Crizotinib            | ALK inhibitor             | Yes                                                    |

\* patient of mixed phenotype acute leukemia
